# Supplementary material
Source: Royal Society of Chemistry journal article supplement (doi:10.1039/d6an00290k)
Supplement: d6an00290k1.pdf [file d6an00290k1.pdf]

## Supporting information(S1)

### Molybdenum Disulfide Quantum Dots as Dual-Function Catalysts and Coreactants for Enhanced Ru(bpy)<sub>3</sub><sup>2+</sup> Electrochemiluminescence

Xiu Yang<sup>a</sup>, Jianjun Shi<sup>a\*</sup>, Hui Zhu<sup>b</sup>, Changjie Mao<sup>b\*</sup>

<sup>a</sup> School of Chemical and Blasting Engineering, Anhui University of Science and  
Technology, Huainan, 232001, China

<sup>b</sup> School of Chemistry and Chemical Engineering, Anhui University, Hefei, 230601,  
China

\* Corresponding authors

Email addresses: jianjunshi@126.com (Jianjun Shi),  
maochangjie@sina.com (Changjie Mao)

### Determination of the ECL efficiency

The ECL efficiency represents the ratio of photons emitted to the number of electrons excited. Its absolute efficiency is denoted as

$$\Phi_{\text{ECL}} = \frac{\int_0^{t'} \text{ECL} dt}{\int_0^{t'} i dt}$$

(1)

Where “ECL” and “i” refer to ECL photon count and Faradaic electrochemical current value, respectively.

Taking Ru(bpy)<sub>3</sub><sup>2+</sup>/TPrA system as a reference, the relative efficiency is expressed as

$$\frac{\Phi_{\text{st}}}{\Phi_{\text{x}}} = \frac{\left( \frac{\int_0^{t'} \text{ECL} dt}{\int_0^{t'} i dt} \right)_{\text{st}}}{\left( \frac{\int_0^{t'} \text{ECL} dt}{\int_0^{t'} i dt} \right)_{\text{x}}} = \frac{\left( \frac{\int_0^{t'} \text{ECL} dt}{Q} \right)_{\text{st}}}{\left( \frac{\int_0^{t'} \text{ECL} dt}{Q} \right)_{\text{x}}}$$

(2)

Whereas “st” and “x” represent Ru(bpy)<sub>3</sub><sup>2+</sup>/TPrA reference and Ru(bpy)<sub>3</sub><sup>2+</sup>/MoS<sub>2</sub> QDs, respectively.

Since the conversion coefficient between the light intensity and photon number remains consistent across instruments, Eq. 2 can be transformed into

$$\Phi_{\text{st}} = \Phi_{\text{x}} \times \frac{\text{ECL}_{\text{st}} \times Q_{\text{x}}}{Q_{\text{st}} \times \text{ECL}_{\text{x}}}$$

(3)

Assuming the ECL efficiency of  $\text{Ru}(\text{bpy})_3^{2+}/\text{TPrA}$  system is 100%, the relative ECL efficiency of  $\text{Ru}(\text{bpy})_3^{2+}/\text{MoS}_2$  QDs system is tested to be

$$\Phi_{\text{st}} = \frac{\text{ECL}_{\text{st}} \times Q_x}{Q_{\text{st}} \times \text{ECL}_x} \times 100\%$$

(4)

Analysis of the V-I curve and ECL spectra of the ECL reaction, as depicted in Fig. S6, a yielded the ECL and Q values for  $\text{Ru}(\text{bpy})_3^{2+}/\text{TPrA}$  and  $\text{Ru}(\text{bpy})_3^{2+}/\text{MoS}_2$  QDs systems, respectively. By substituting these values into Eq. 4, the relative ECL efficiency of the  $\text{Ru}(\text{bpy})_3^{2+}/\text{MoS}_2$  QDs system was calculated as 89.4%.

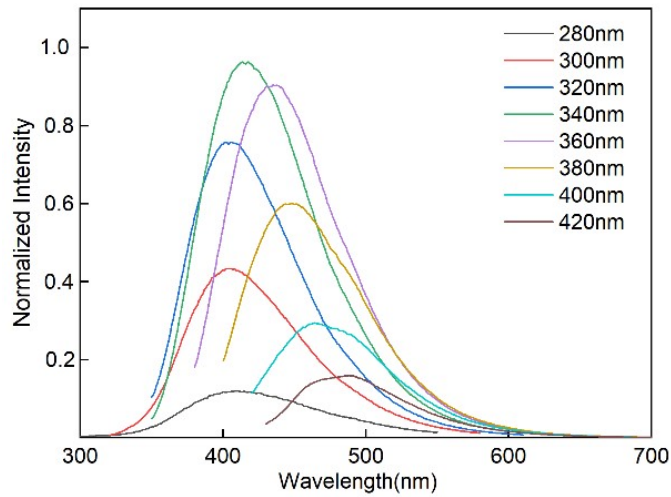

**Fig. S1** Fluorescence spectra of  $\text{MoS}_2$  QDs at different excitation wavelengths.

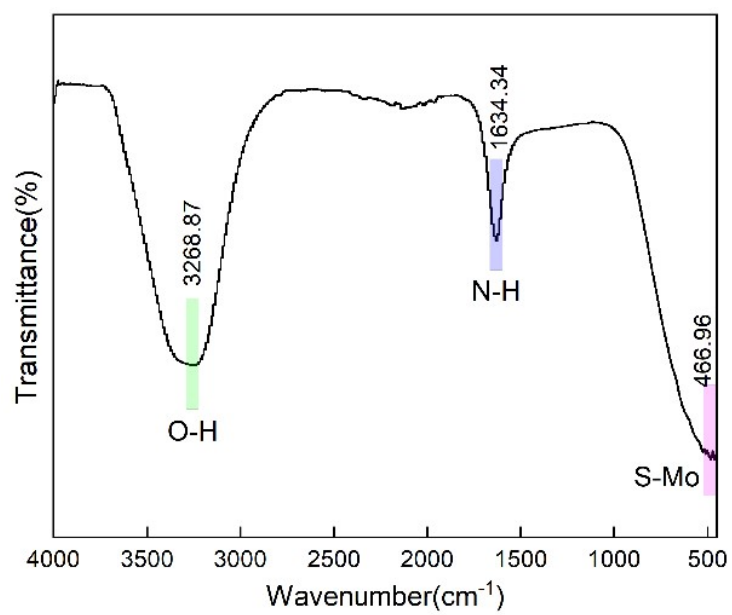

**Fig. S2** FTIR spectrum of MoS<sub>2</sub> QDs

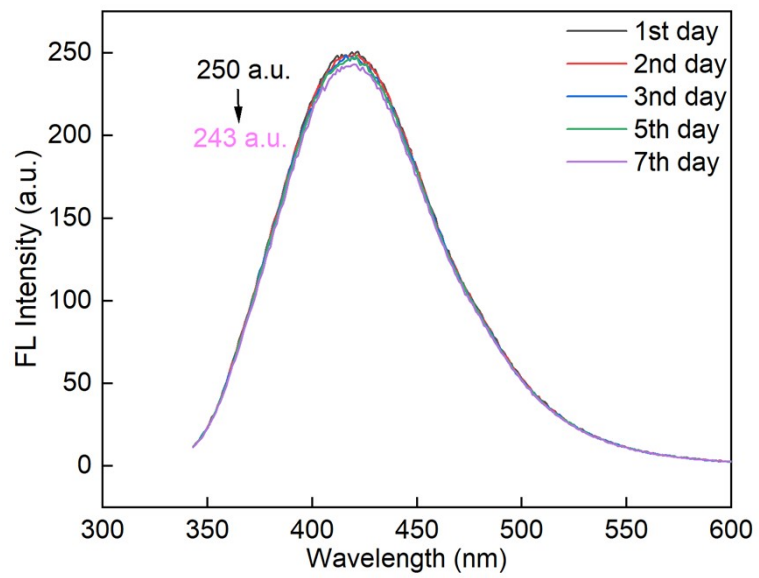

**Fig S3.** Fluorescence emission spectra on days 1, 2, 3, 5, 7.

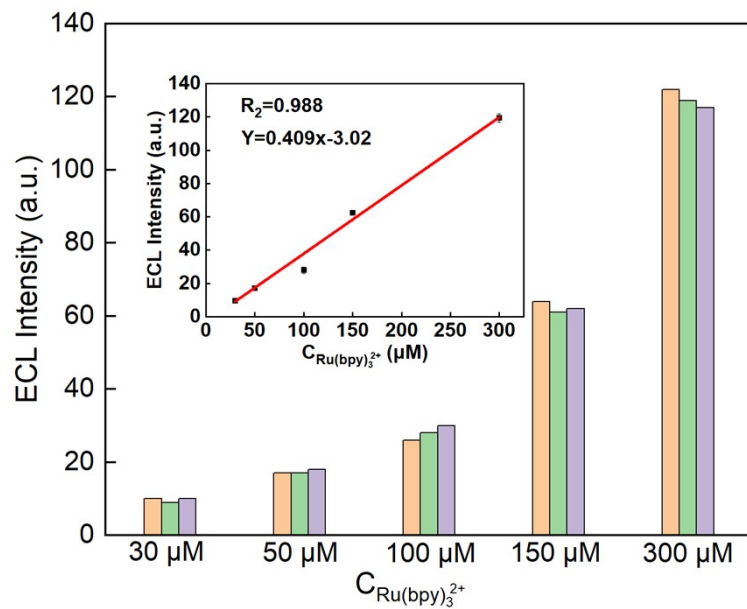

**Fig. S4** The ECL intensity of different concentrations of Ru(bpy)<sub>3</sub><sup>2+</sup>. The inset in the figure shows the fitted curve of Ru(bpy)<sub>3</sub><sup>2+</sup> concentration and ECL intensity (n = 3).

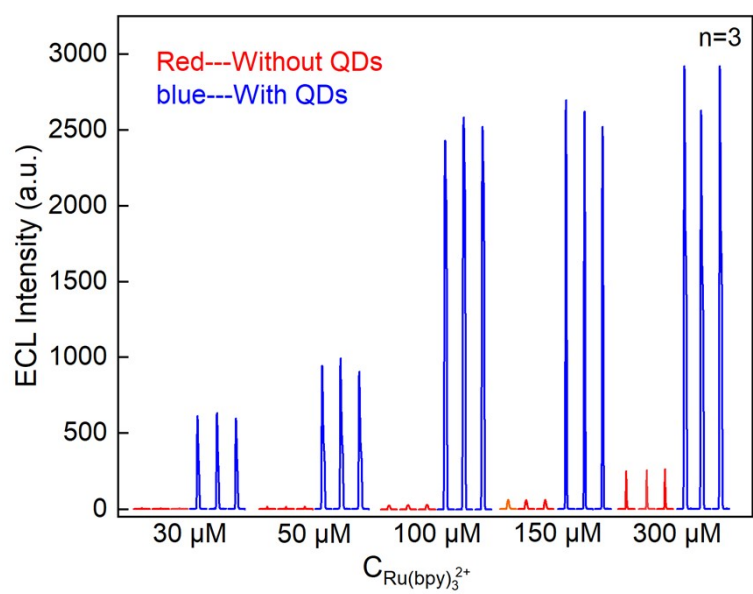

**Fig S5.** ECL intensity curves of solutions with different concentrations of Ru(bpy)<sub>3</sub><sup>2+</sup> with or without MoS<sub>2</sub> QDs (The concentration of MoS<sub>2</sub> QDs is 30μg/mL). (n=3)

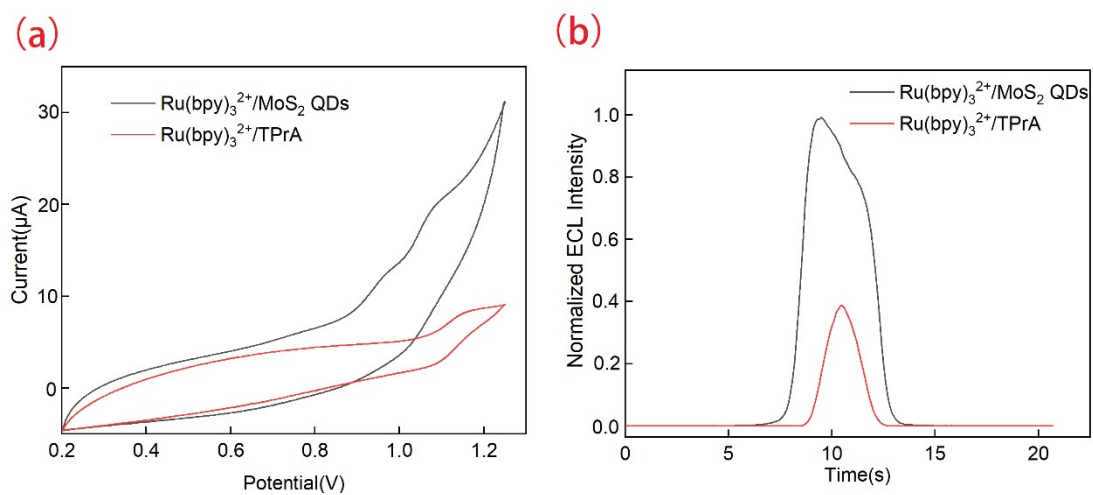

**Fig. S6** CV curves and ECL intensity-time curves of the  $\text{Ru}(\text{bpy})_3^{2+}/\text{TPrA}$  and  $\text{Ru}(\text{bpy})_3^{2+}/\text{MoS}_2$  QDs systems. Electrochemical test conditions:  $\text{MoS}_2$  QDs 20  $\mu\text{g}/\text{mL}$ , TPrA 5mM,  $\text{Ru}(\text{bpy})_3^{2+}$  100  $\mu\text{M}$ , 0.1M PBS, bare electrode.

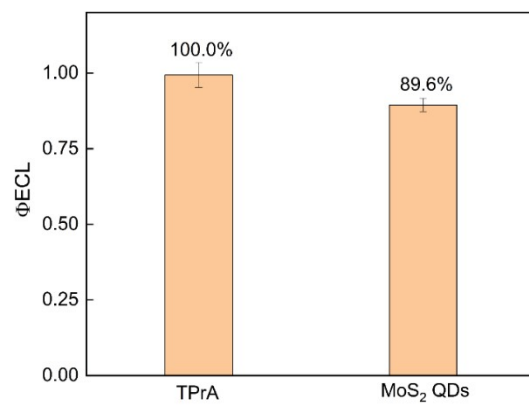

**Fig. S7** ECL efficiencies of Ru(bpy)<sub>3</sub><sup>2+</sup>/TPrA and Ru(bpy)<sub>3</sub><sup>2+</sup>/MoS<sub>2</sub> QDs. (n=3)

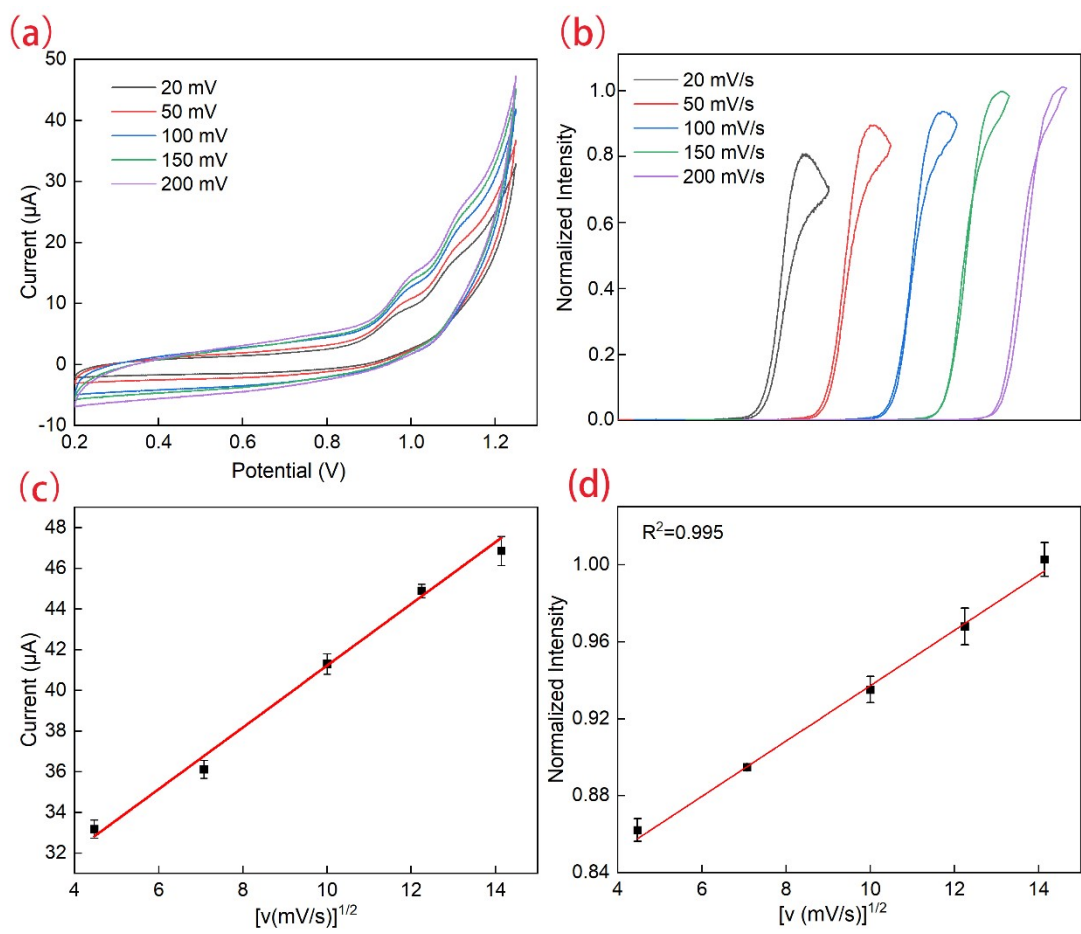

**Fig S8** (a) CV curves and (b) ECL potential curves for 100 μM Ru(bpy)<sub>3</sub><sup>2+</sup> in a 0.1 M PBS solution (pH 10.0) containing 30 μg/mL MoS<sub>2</sub> QDs at various scan rates, and the relationships between (c) the oxidation peak current and (d) the ECL intensity versus  $v^{1/2}$ . (n=3)

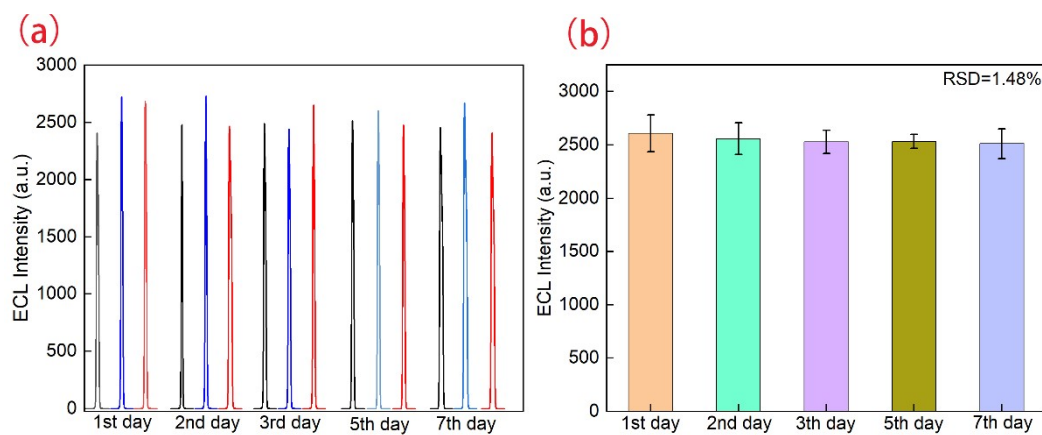

**Fig S9.** (a) ECL response curves of the  $\text{Ru}(\text{bpy})_3^{2+}/\text{MoS}_2$  QDs system on days 1, 2, 3, 5, 7 ( $n=3$ ); (b) ECL intensity error bars on days 1, 2, 3, 5, 7, RSD=1.48%; Electrochemical test conditions:  $\text{MoS}_2$  QDs  $30 \mu\text{g/mL}$ ,  $\text{Ru}(\text{bpy})_3^{2+}$   $100 \mu\text{M}$ , PBS  $0.1 \text{ M}$ , GCE.

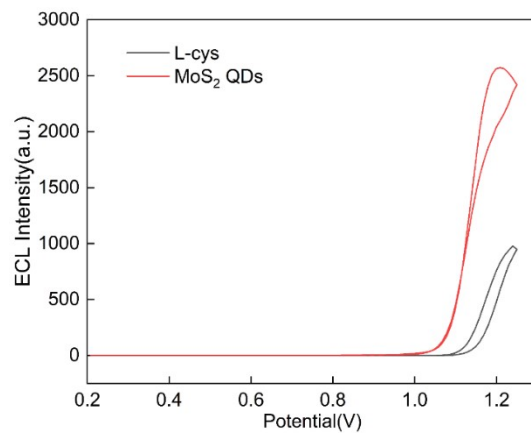

**Fig. S10** Enhancement effect of L-cysteine and MoS<sub>2</sub> QDs on Ru(bpy)<sub>3</sub><sup>2+</sup>

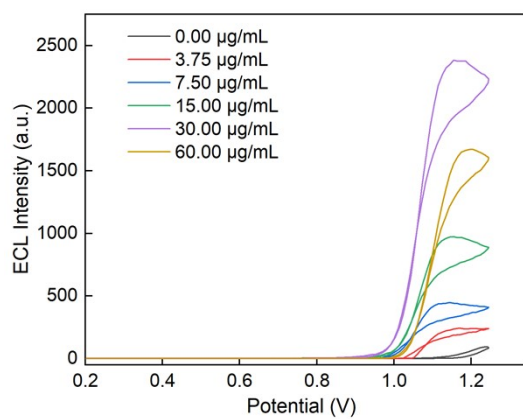

**Fig. S11** The influence of the addition amount of MoS<sub>2</sub> QDs on the MoS<sub>2</sub> QDS/Ru(bpy)<sub>3</sub><sup>2+</sup> system; The concentration of Ru(bpy)<sub>3</sub><sup>2+</sup> is 100 µM.

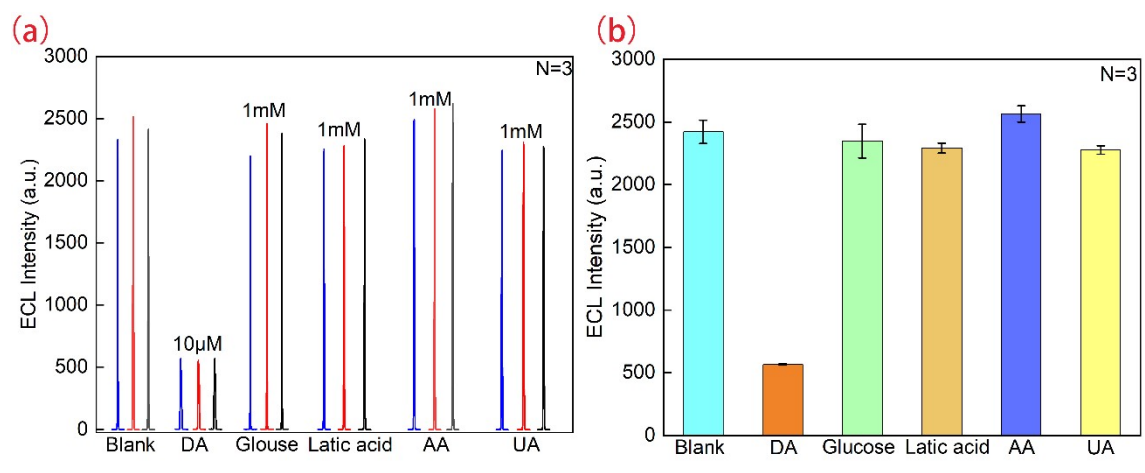

**Fig. S12** (a) ECL intensity changes upon addition of different substances (DA, glucose, lactic acid, AA, UA); (b) Corresponding bar graph showing ECL intensity variations (n=3)
